# Supplementary material for: Technical note: A new approach to discriminate different black carbon sources by utilising fullerene and metals in positive matrix factorisation analysis of high-resolution soot particle aerosol mass spectrometer data
Source: Copernicus journal article supplement (doi:10.5194/acp-21-10763-2021), 2021-07-15
Supplement: Supplementary file 1 [file acp-21-10763-2021-supplement.pdf]

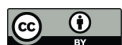

*Supplement of*

**Technical note: A new approach to discriminate different black carbon sources by utilising fullerene and metals in positive matrix factorisation analysis of high-resolution soot particle aerosol mass spectrometer data**

**Zainab Bibi et al.**

*Correspondence to:* Zainab Bibi ([zainab.bibi@manchester.ac.uk](mailto:zainab.bibi@manchester.ac.uk)) and James D. Allan ([james.allan@manchester.ac.uk](mailto:james.allan@manchester.ac.uk))

The copyright of individual parts of the supplement might differ from the article licence.

**Table S1: Pearson correlation coefficients between different BC measurements, specifically rBC (HR-SP-AMS) with eBC (AE31) and BrC (AE31) and eBC (MAAP)**

| <b>rBC (HR-SP-AMS)</b> |                            |
|------------------------|----------------------------|
|                        | <b>Pearson Coefficient</b> |
| <b>eBC (AE31)</b>      | 0.98                       |
| <b>BrC (AE31)</b>      | 0.96                       |
| <b>eBC (MAAP)</b>      | 0.95                       |

**Table S2: Correlation between BC (HR-SP-AMS) and CIMS measurements**

| <b>HR-SP-AMS</b>       | <b>CIMS DATA</b>           |                            |                            |
|------------------------|----------------------------|----------------------------|----------------------------|
|                        | <b>HCN</b>                 | <b>HCNO</b>                | <b>HONO</b>                |
|                        | <b>Pearson Coefficient</b> | <b>Pearson Coefficient</b> | <b>Pearson Coefficient</b> |
| <b>rBC (HR-SP-AMS)</b> | 0.88                       | 0.77                       | 0.89                       |

**Table S3: Correlation between HR-Aerosols species Vs Aerosol and Gases (AMS)**

| <b>HR Aerosol Species</b> | <b>Aerosol and Gases</b>              | <b>Pearson Coefficient</b> |
|---------------------------|---------------------------------------|----------------------------|
| <b>rBC</b>                | BC_(ugm <sup>-3</sup> )               | 0.95                       |
| <b>HROrg</b>              | Org_(ugm <sup>-3</sup> )              | 0.92                       |
| <b>HRNH<sub>4</sub></b>   | NH <sub>4</sub> _(ugm <sup>-3</sup> ) | 0.92                       |
| <b>HRNO<sub>3</sub></b>   | NO <sub>3</sub> _(ugm <sup>-3</sup> ) | 0.86                       |
| <b>HRSO<sub>4</sub></b>   | SO <sub>4</sub> _(ugm <sup>-3</sup> ) | 0.91                       |
| <b>HRChl</b>              | Chl_(ugm <sup>-3</sup> )              | 0.99                       |

PMF Factorisation factors solution without inclusion of Fullerenes signals:

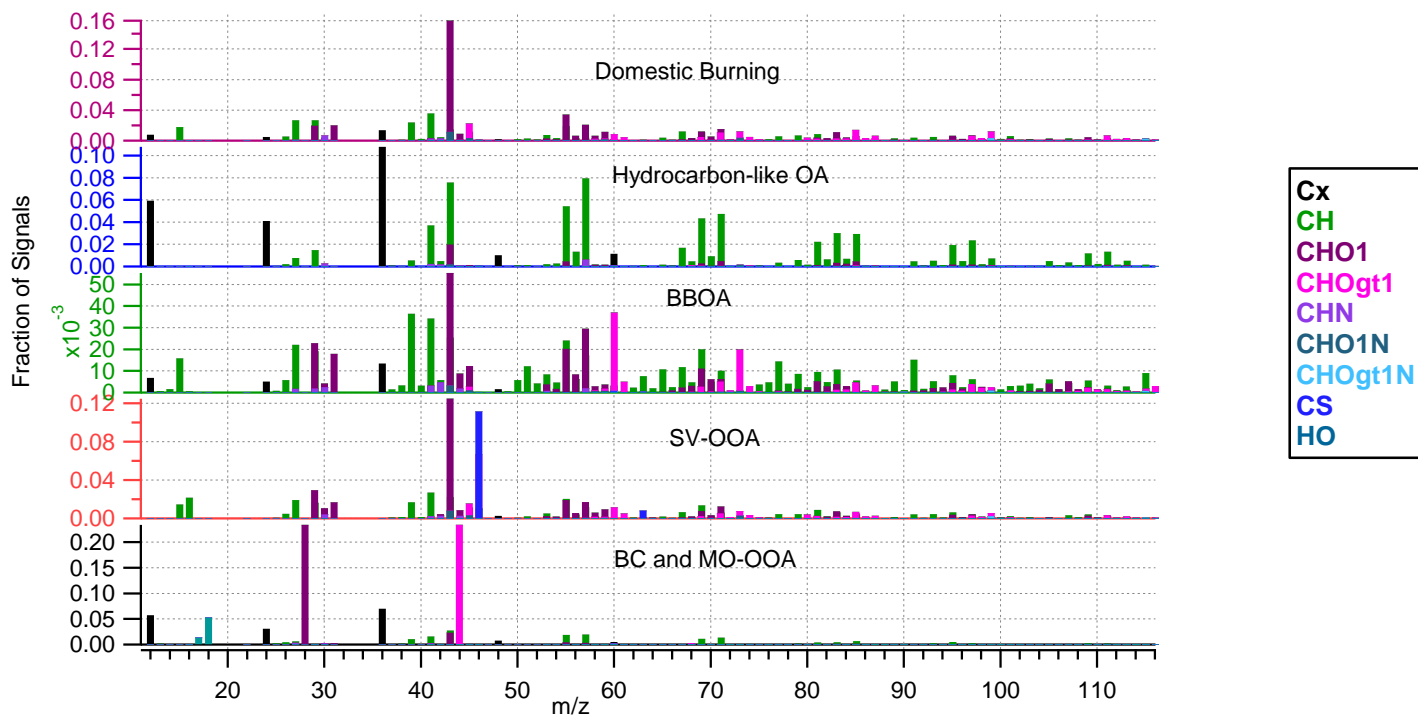

Figure S1a Mass Spectra of five factors solution (without inclusion of fullerene signals).

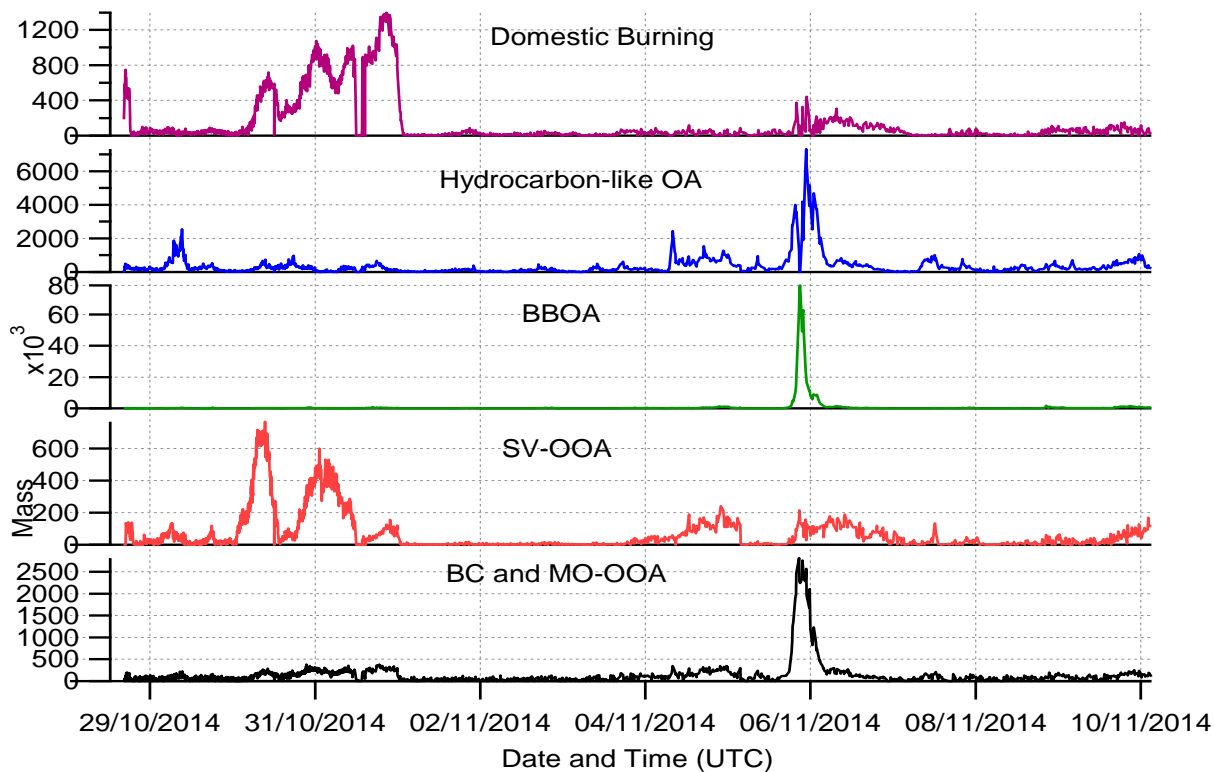

Figure S1b time series of five factors (without the inclusion of fullerene data).

**PMF Factorisation factors solution with inclusion of Fullerenes signal**

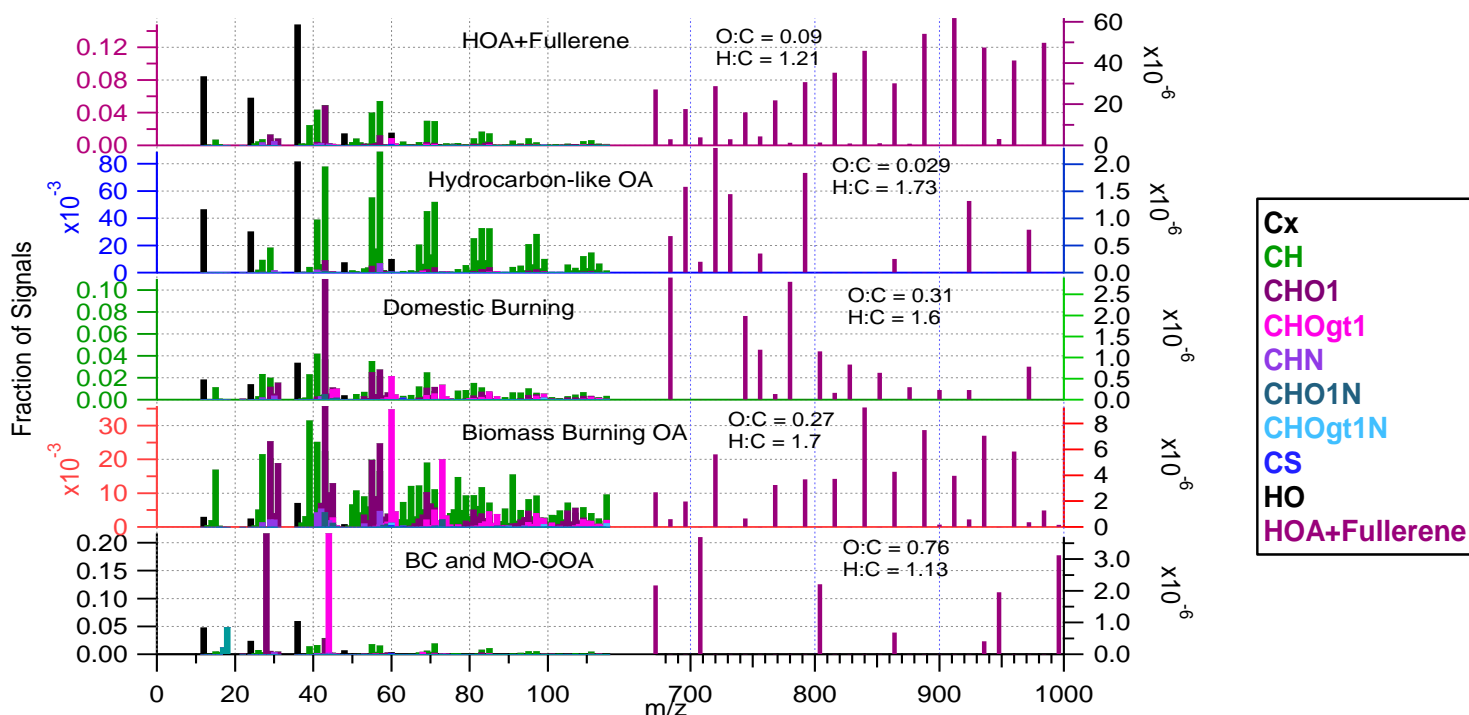

**Figure S2a: PMF five factors source profile (factor 1 = BC and MO-OOA, factor 2 = BBOA, factor 3 = Domestic burning OA, factor 4 = Hydrocarbon-Like OA, factor 5 = Fullerene). (with the inclusion of Fullerene data)**

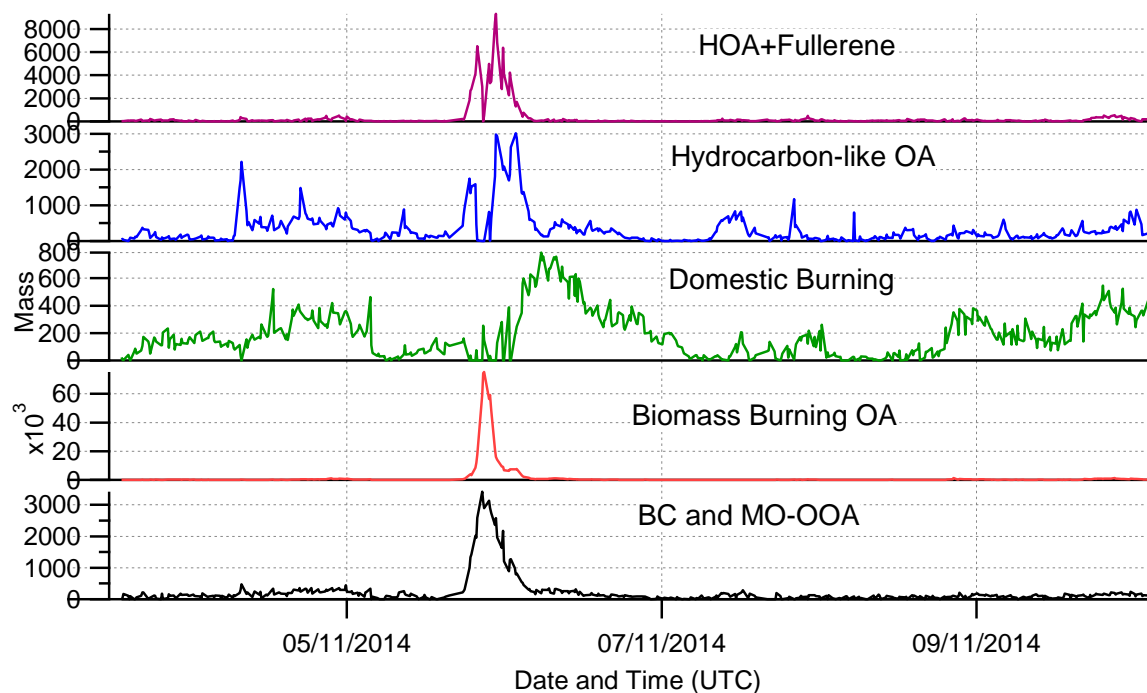

**Figure S2b: The time series of five factor solution (with the inclusion of Fullerene data).**





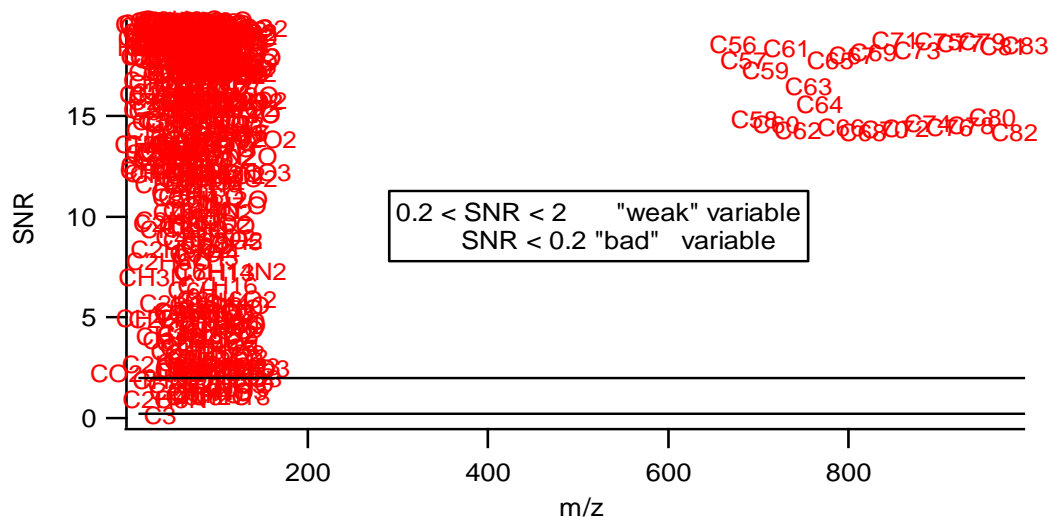

Figure S4b shows the SNR of organics and fullerenes with little modification in the model error value i.e. 0.05

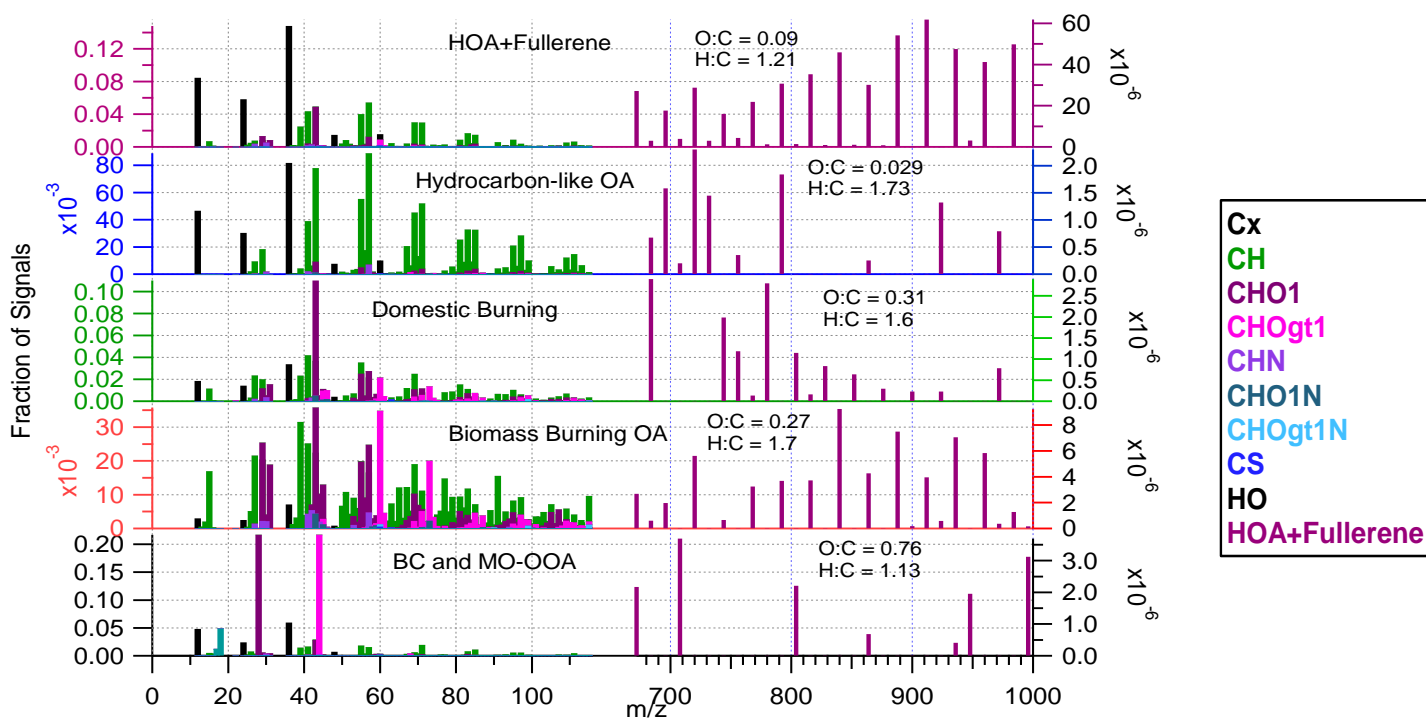

Fig S5a PMF five factors profile detected by the model error 0.10

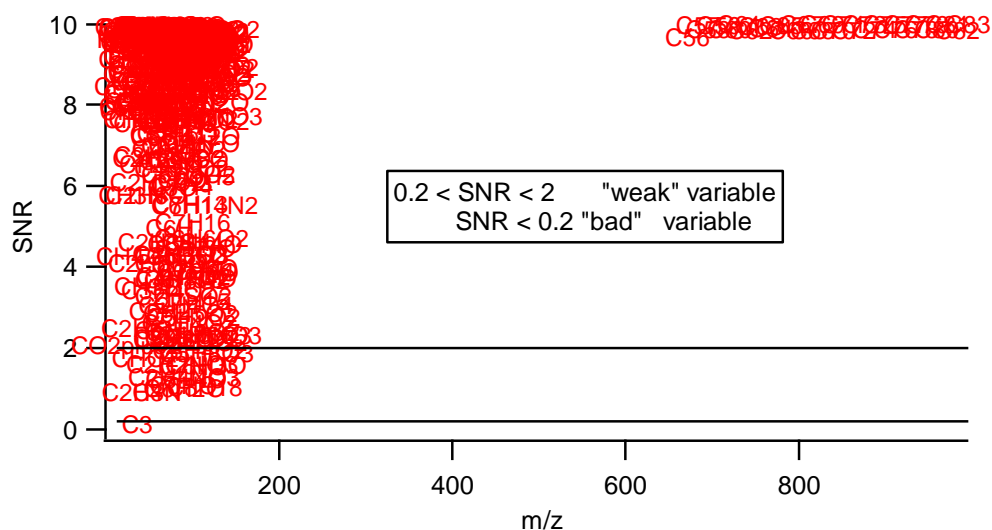

Figure S5b shows the SNR of organics and fullerenes with more modification in the model error value i.e. 0.10.

**PMF factors solution selection:**

A range of solutions were obtained using different parameters as part of the PMF analysis and here we present the reasons behind the choice of solution used in the paper. Regarding the number of factors, a 5-factor solution was chosen instead of 6-factor solution because all the five factors are separated from one another and represent a specific soot source (fig S6a, b). In comparison, the 6-factor solution has two ‘split’ factors representing the same emissions. These are factor 2 and factor 4 in figure S7b and represent domestic wood burning sources because their peaks were evident before and after the bonfire night event (fig. S7a, S7b).

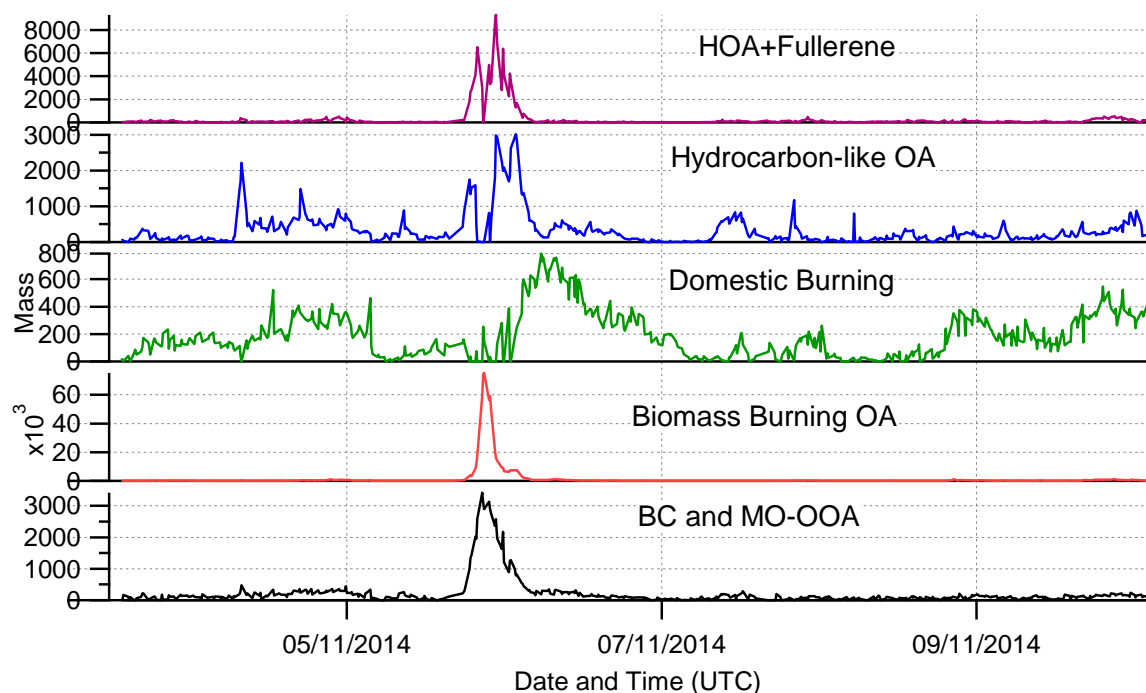

Figure S6a: Time series of five factors solution detected separately under the condition of 0.10 model error.



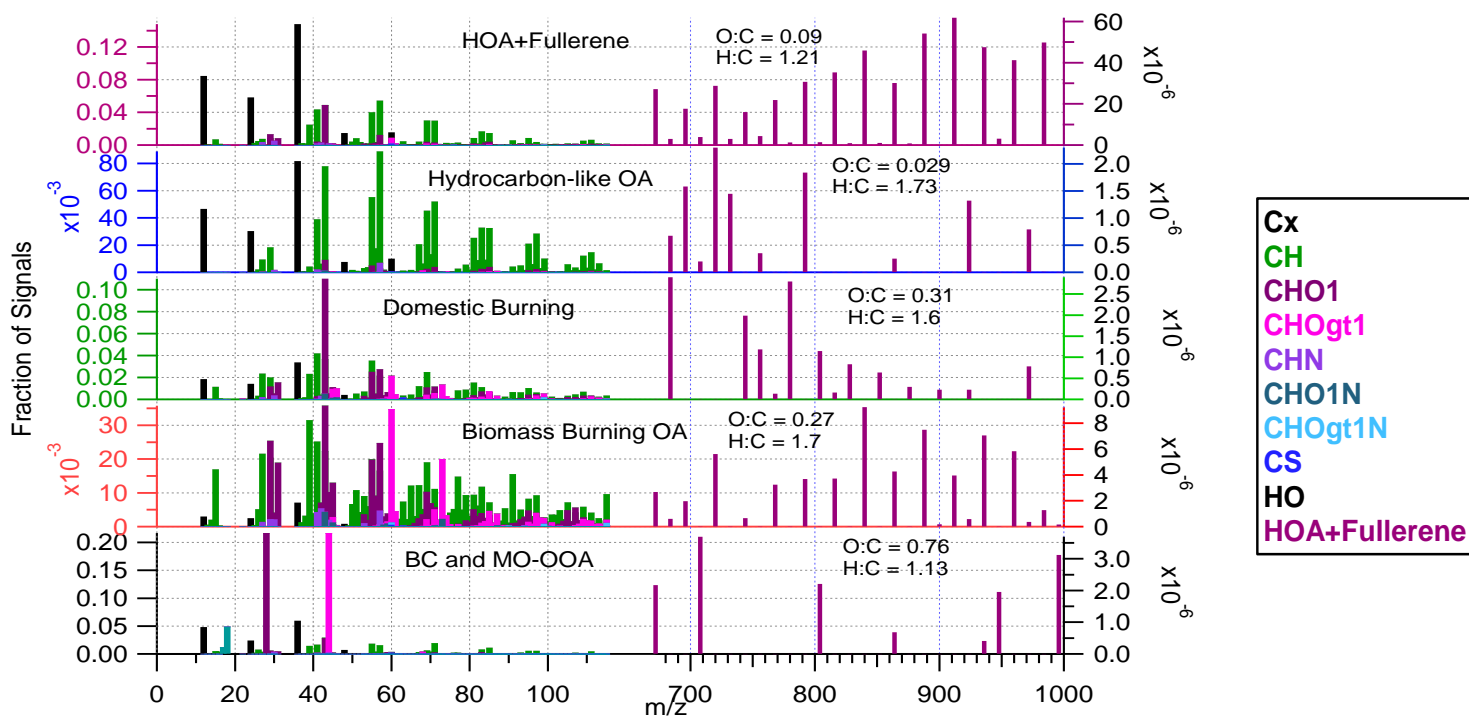

Figure S6b: The factor profile of five factors solution detected separately under the condition of 0.10 model error.

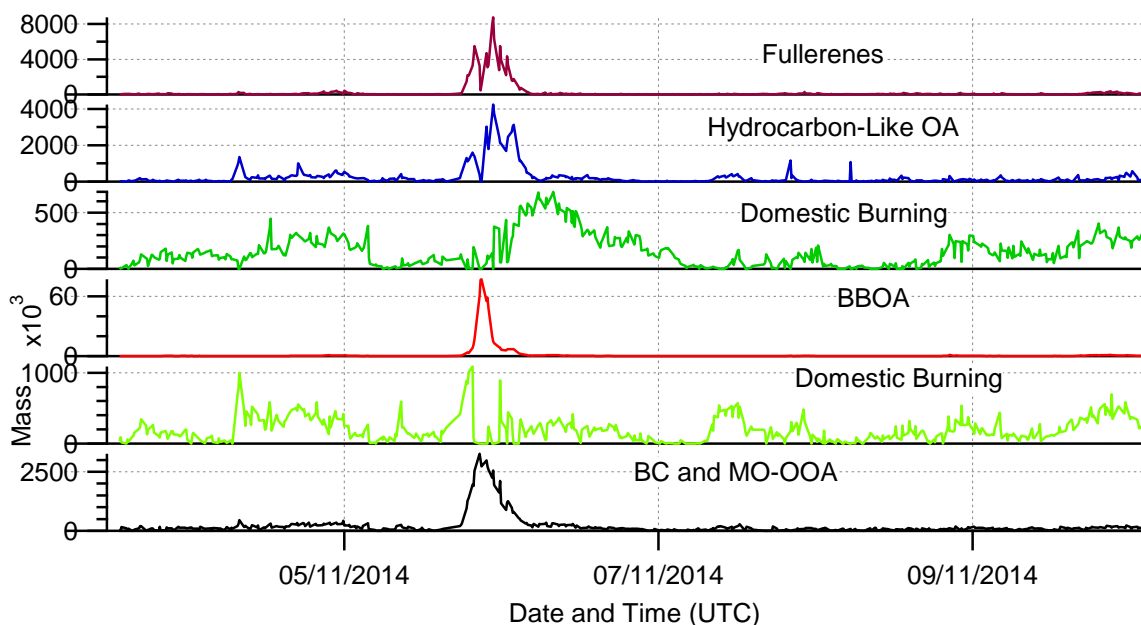

Figure S7a: Time series of six factors solution in which two same factors are split in to two different factors i.e. 2 and 4 under the condition of 0.10 model error.

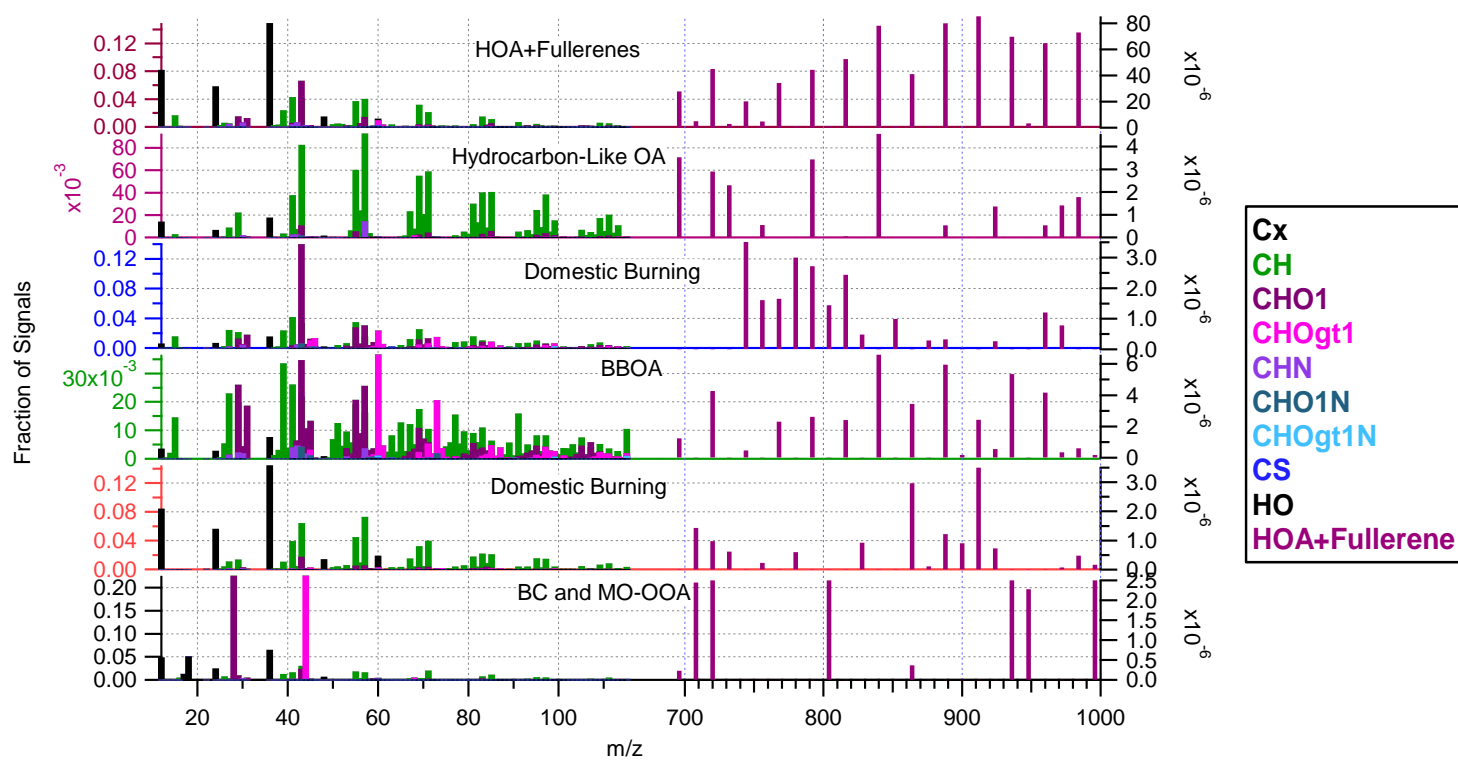

**Figure S7b: Factor profiles of the 6-factor solution in which factor 2 and 4 have the same m/z spectrum, under the condition of 0.10 model error.**
